1 Mechanism through which retrocyclin targets flavivirus multiplication

2 Xiaoying Jia, <sup>a, b</sup> Jiao Guo, <sup>a, b</sup> Weirong Yuan <sup>c</sup>, Lingling Sun <sup>c</sup>, Yang Liu, <sup>a</sup> Minmin

3 Zhou, <sup>a, b</sup> Gengfu Xiao, <sup>a, b</sup> Wuyuan Lu <sup>c</sup>, Alfredo Garzino-Demo <sup>c, d #</sup>, Wei Wang <sup>a, b #</sup>

4 State Key Laboratory of Virology, Wuhan Institute of Virology, Center for Biosafety

5 Mega-Science, Chinese Academy of Sciences, Wuhan 430071, China <sup>a</sup>

6 University of the Chinese Academy of Sciences, Beijing 100049, China <sup>b</sup>

7 Department of Microbiology and Immunology, the Institute of Human Virology,

8 University of Maryland School of Medicine <sup>c</sup>

9 Department of Molecular Medicine, University of Padova, Italy <sup>d</sup>

10

11 **Running title:** Mechanism of flavivirus-targeting by retrocyclin

12 **Key Words:** retrocyclin-101, flavivirus, antiviral effect, NS2B-NS3 protease, DE

13 loop

14 **Word count:** abstract = 162, text = 3098

15 # Address correspondence to Alfredo Garzino-Demo

16 [agarzinodemo@ihv.umaryland.edu](mailto:agarzinodemo@ihv.umaryland.edu), and Wei Wang, [wangwei@wh.iov.cn](mailto:wangwei@wh.iov.cn)

17

18 **Abstract:** Currently, there are no approved drugs for the treatment of flavivirus

19 infection. Accordingly, we tested the inhibitory effects of the novel  $\theta$ -defensin

20 retrocyclin-101 (RC-101) against flavivirus infection, and investigated the mechanism

21 underlying the potential inhibitory effects. First, RC-101 robustly inhibited both

22 Japanese encephalitis virus (JEV) and Zika virus (ZIKV) infections. RC-101 exerted

23 inhibitory effects on the entry and replication stages. Results also indicated that the  
24 non-structural protein NS2B-NS3 serine protease might serve as a potential viral  
25 target. Further, RC-101 inhibited protease activity at the micromolar level. We also  
26 demonstrated that with respect to the glycoprotein E protein of flavivirus, the DE loop  
27 of domain III, which is the receptor-binding domain of the E protein, might serve as  
28 another viral target of RC-101. Moreover, a JEV DE mutant exhibited resistance to  
29 RC-101, which was associated with decreased binding affinity of RC-101 to DIII.  
30 These findings provide a basis for the development of RC-101 as a potential candidate  
31 for the treatment of flavivirus infection.

32

### 33 **Importance**

34 RC has been reported to have a broad-spectrum antimicrobial activity. In this study,  
35 we firstly report that RC-101 could inhibit ZIKV and JEV infections. Moreover, both  
36 the NS2B-NS3 serine protease and the DE loop in the E glycoprotein might serve as  
37 the viral targets of RC-101.

38

### 39 **Introduction**

40 Flaviviruses are taxonomically classified in the genus *Flavivirus* and family  
41 Flaviviridae. These viruses include more than 70 different pathogens and are  
42 transmitted mostly by arthropods. Emerging and re-emerging flaviviruses, such as Zika  
43 virus (ZIKV), Japanese encephalitis virus (JEV), dengue virus (DENV), West Nile  
44 virus (WNV), and yellow fever virus, cause public health problems worldwide (1).

45 Flaviviruses contain an approximately 11-kb positive-stranded RNA genome that  
46 encodes three structural proteins, including the capsid (C), membrane (premembrane  
47 [prM] and membrane [M]), and envelope (E), as well as seven nonstructural proteins  
48 (NS1, NS2A, NS2B, NS3, NS4A, NS4B, and NS5) (2). The envelope glycoprotein (E)  
49 is responsible for receptor binding and membrane fusion and thus plays essential roles  
50 in virus entry. E proteins exist as homodimers on the surface of the virus. Among the  
51 three domains of the E protein, domain I (DI) connects the DII and DIII domains, and  
52 DII contains fusion polypeptides that facilitate membrane fusion, whereas DIII has  
53 been proposed to act as the receptor binding region (3-5). It has been reported that  
54 several key residues, such as the glycosylation site N154 and the DE loop  
55 (T<sub>363</sub>SSAN<sub>367</sub>) are responsible for receptor binding (6, 7), whereas H144 and H319  
56 are thought to play critical roles in DI and DIII interactions (8). Moreover, Q258  
57 located in DII and T410 located in the stem are indispensable for low pH-triggered  
58 conformational changes, in which the stem region undergoes zippering along with DII,  
59 thus leading to the post-fusion conformation and membrane fusion (9-11). As it  
60 envelops the surface of the virion, the E protein is the natural target for antibodies and  
61 the design of entry inhibitors to prevent receptor-binding and membrane fusion (4, 9,  
62 12, 13). Likewise, viral proteases such as NS2B-NS3 protease-helicase and the NS5  
63 RNA-dependent RNA polymerase represent attractive drug targets in an attempt to  
64 identify replication inhibitors (14, 15).

65 Retrocyclin (RC) is an artificially humanized  $\theta$ -defensin that has been reported  
66 to possess broad antimicrobial activity (16-21). RC-101 contains 18 residues including

67 three disulfide bonds and four positively charged residues (Fig. 1A and B), which  
68 confers high binding affinity to glycosylated proteins, such as HIV gp120 (22),  
69 influenza hemagglutinin (23), and HSV1/2 glycoprotein (24), thus preventing virus  
70 entry. Additionally, some viral proteases with negatively charged surfaces might serve  
71 as targets for RC (20). In this study, we tested the inhibitory effect of RC-101 against  
72 flavivirus infection. As flaviviruses possess only one conserved N-linked glycan on the  
73 E protein (25), whether RC exerted the inhibitory effect against flavivirus entry by  
74 targeting the glycan chain was tested in this study. Meanwhile, we determined that  
75 RC-101 could also inhibit flavivirus replication by blocking the NS2B-NS3 serine  
76 protease.

77

## 78 **Results**

### 79 **RC-101 inhibits ZIKV infection**

80 To test the inhibitory effect of RC-101 against ZIKV infection, two strains were used  
81 to determine the 50% inhibitory concentration (IC<sub>50</sub>) of RC-101. Notably, the ZIKV  
82 PRVABC59 strain, belonging to the Asian-lineage ZIKV strains, contains one  
83 N-linked glycosylation site (N-X-S/T) at residue N154 of E, which is conserved  
84 among the flaviviruses, whereas the MR766 strain, belonging to the African lineage,  
85 lacks the glycosylation motif because of extensive passaging that leads to virus  
86 variants (26-31). A schematic of the assay is depicted in the upper panels of Fig. 1C  
87 and D. The incubation time of MR766 was 72 h, whereas that of PRVABC59 was 48 h,  
88 because the cytopathic effect of MR766 occurred 1 day after that of PRVABC59 with

89 the same multiplicity of infection (MOI). As shown in Fig. 1C and D, RC-101  
90 effectively blocked both ZIKV strain infections with IC<sub>50</sub> values of 7.537 μM for  
91 PRVABC59 and 18.85 μM for MR766.

### 92 **RC-101 inhibits ZIKV infection at both the entry and replication steps**

93 To test whether RC-101 blocked the entry step or the replication step, a  
94 time-of-addition experiment was performed (Fig. 2A). As shown in Fig. 2B and C, no  
95 suppression of viral titers was observed in the *pre-* or the *virucidal* treatment groups,  
96 indicating that RC-101 does not inhibit ZIKV infection either by blocking the cellular  
97 receptors that prevent virus binding or by inactivating the virus directly. However,  
98 RC-101 exerted significant inhibitory effects when its addition was synchronized with  
99 the virus in the *during* manner. Moreover, RC-101 inhibited MR766 strain infection  
100 when it was added 1 h post-infection. These results suggested that viral entry and  
101 replication are the stages at which RC-101 shows inhibitory activity.

102 To confirm the inhibitory effect on viral replication, we investigated the effects of  
103 RC-101 on ZIKV replicon. As shown in Fig. 3, RC-101 showed little effect on the  
104 initial translation of replicon RNA (32, 33) (Fig. 3A), whereas an appreciable  
105 reduction in the luciferase signal was observed at 48 h post-electroporation (Fig. 3B).  
106 This confirmed that RC-101 has an inhibitory effect on the ZIKV replication state.

### 107 **RC-101 inhibits NS2B-NS3 serine protease activity**

108 To investigate the potential viral target of RC-101, we tested the inhibitory effect of  
109 RC-101 on ZIKV NS2B-NS3 protease activity. It has been reported that RC-1, which  
110 possesses the same residue sequence as RC-101, except for one lysine (K) instead of

111 arginine (R) in RC-101, might dock at the NS2B and NS3 interface and thus inhibit  
112 DENV-2 replication by interfering with the activity of the NS2B-NS3 serine protease  
113 (20). Considering the sequence and structural conservation of flavivirus NS proteins,  
114 we reasoned that RC-101 might have a similar effect on the ZIKV NS2B-NS3  
115 protease. To test this hypothesis, we first produced NS2B-NS3pro in *Escherichia coli*  
116 as a single-chain peptide (20, 34, 35). Protease activity was assessed using a  
117 fluorogenic peptide as a substrate at 37 °C for 30 min. As shown in Fig. 4A, the  
118 Michaelis-Menten constant ( $K_m$ ) value was 11.77  $\mu\text{M}$ , indicating that the enzyme  
119 kinetic assay was robust and suitable to investigate the inhibitory effect. As shown in  
120 Fig. 4B, RC-101 effectively inhibited NS2B-NS3 protease activity with an  $\text{IC}_{50}$  of  
121 7.20  $\mu\text{M}$ , indicating that this protease serves as a viral target of RC-101.

### 122 **RC-101 inhibits flavivirus entry by targeting the DE loop of E glycoprotein**

123 As RC-101 was found to inhibit ZIKV infection both at the entry and replication  
124 stages (Fig. 2), we further investigated the mechanism underlying the inhibitory effect  
125 on the entry stage. As previously mentioned, RC has been reported to inhibit different  
126 types of enveloped viruses by binding to the negatively charged glycan chains on the  
127 surface of the glycoprotein, thus blocking virus entry (22-24). However, flaviviruses  
128 contain only one glycosylation motif on the E glycoprotein, but this the number is not  
129 absolutely conserved, as DENV has two glycosylation motifs, whereas some  
130 African-lineage ZIKV strains have no glycan chain on the surface (26-31, 36-38). As  
131 shown in Fig. 1, RC-101 exerted similar inhibitory effects on both the ZIKV Asian  
132 strain PRVABC59 (one glycan) and the African strain MR766 (no glycan), suggesting

133 that glycan might not be the target of RC-101. As RC-101 could block ZIKV infection  
134 at the entry stage (Fig. 2), we further investigated its effect on the E protein.

135 In our previously published work, we constructed a series of JEV variants with  
136 mutations in the receptor-binding motif or in amino acids critical for membrane fusion  
137 on the E protein (6). Considering the relative conservation of the sequence and  
138 structure of flavivirus E proteins, we used the constructed JEV variants to investigate  
139 the potential target of RC-101. Among the selected variants, the N154A and DE  
140 mutants were found to impair receptor binding by the virus, H144A and H319A  
141 abrogated the interaction between DI and DIII, and Q258A and T410A resulted in  
142 failure of the E protein to re-fold to form its post-fusion conformation (6). Notably,  
143 these six tested sites were conserved between JEV and ZIKV (Fig. 5). The  
144 investigation was conducted using the “during” manner (Fig. 6A). As shown in Fig.  
145 6B and C, RC-101 at 50  $\mu$ M, corresponding to the approximate  $IC_{98}$  against ZIKV  
146 (Fig. 1), robustly inhibited JEV infection, which made the prM band hardly detectable,  
147 and the viral titers decreased by approximately 3 log units. Similarly, RC-101  
148 inhibited infections by viruses harboring N154A and H144A, suggesting that neither  
149 N154 nor H144 is the target of RC-101. Of note, the outcome indicating that  
150 abolishing the glycosylation motif (N154A) resulted in retained sensitivity to RC-101  
151 was in line with the notion that differences in the number of glycan chains in different  
152 strains have little effect on RC-101 inhibition (Fig. 1). This further confirmed that  
153 RC-101 has a unique anti-flavivirus mechanism, which is unlike the effects on other  
154 enveloped viruses. Notably, as shown in Fig. 6B and C, the Q258A mutant likely had

155 increased sensitivity to RC-101, whereas H319A resulted in resistance to RC-101 at  
156 the protein level and in the low MOI infection assay. Among the six tested mutants,  
157 the DE mutant and T410A showed robust resistance to RC-101 in all assays,  
158 indicating that these two mutants do confer resistance and might serve as the viral  
159 glycoprotein target(s) of RC-101. As T410 is located in the stem region of the E  
160 protein, buried by the compacted E dimer and hardly accessible in the prefusion  
161 conformation, the DE mutant was selected for further investigation of the binding  
162 affinity to RC-101.

### 163 **DE loop mutant decreases binding affinity to RC-101**

164 To test the possibility that the DE loop is the target of RC-101, and to test whether the  
165 DE mutant would disrupt the binding of RC-101 to DIII, the binding affinities of WT  
166 and the DE mutant DIII to RC-101 were examined by biolayer interferometry. The  
167 interactions between DIII and RC-101 were calculated using a 1:1 binding model at  
168 three different concentrations (Fig. 7). The results showed that RC-101 bound to WT  
169 DIII with a kinetic association ( $K_a$ ) of  $1.46 \times 10^4 \text{ M}^{-1} \text{ s}^{-1}$ , kinetic dissociation ( $K_d$ ) of  
170  $1.18 \times 10^{-4} \text{ s}^{-1}$ , and  $K_D$  of  $8.10 \times 10^{-9} \text{ M}$ , indicating that RC-101 has high affinity for  
171 DIII. The binding affinity of RC-101 to the DE mutant was decreased by one order of  
172 magnitude, to a  $K_D$  with  $2.37 \times 10^{-8} \text{ M}$ , which suggested that the DE loop might be  
173 the binding site of RC-101 and that the DE mutant would disrupt this interaction.

174

### 175 **Discussion**

176 Although RC has been reported to have inhibitory effects against different kinds of



177 viruses with various antiviral mechanisms, few studies have investigated its effect on  
178 flaviviruses. In this study, we evaluated the antiviral effects of RC-101 against  
179 flaviviruses and elucidate the mechanism of action. As the analogue RC-1 has been  
180 reported to inhibit DENV NS2B-NS3 protease and viral replication, we first tested  
181 whether RC-101 could extend its antiviral spectrum to other flaviviruses. As a result,  
182 RC-101 was found to inhibit infections by different strains of ZIKV, as well as JEV.  
183 Further, results suggest that the NS2B-NS3 protease might serve as one of the viral  
184 targets since RC-101 could block the serine protease activity of NS2B-NS3. The NS3  
185 proteolytic domain forms a substrate-binding pocket with a catalytic triad, conserved  
186 in flaviviruses, of His-Asp-Ser (Fig. 8A). In an attempt to dock the analogue RC-2  
187 (PDB: 2LZI) (39) with ZIKV NS3 (PDB: 5ZMS) (40), we found that glycine in RC-2  
188 might interact with histidine (H1553) and serine (S1673) in the catalytic triad (Fig.  
189 8B). RC-101 might thus inhibit NS2B-NS3 protease activity by competitively  
190 blocking the catalytic motif and thus preventing substrate binding. Meanwhile, as a  
191 cationic peptide, RC-101 might directly interact with the negatively charged NS2B  
192 and thus prevent the binding of NS2B and NS3 (20, 41).

193 As mentioned previously herein, RC has been extensively reported to inhibit  
194 enveloped viruses by targeting the negative glycan shield on the surface of the virus,  
195 thus blocking the initial entry of the virus into host cells (22-24). As the only glycan  
196 chain in the E protein of ZIKV PRVABC59 strain and JEV, the glycan linked to the  
197 N<sub>154</sub>YS glycosylation motif has been reported to interact with DC-SIGN, which is a  
198 candidate flavivirus receptor (42). Intriguingly, the N154A mutation had no impact on

199 the sensitivity or resistance of JEV to RC-101. A possible explanation for this  
200 phenomenon is that RC could easily bind the dense glycan shield of gp120 and HA of  
201 HIV and IAV, respectively, but for the flavivirus, RC might pass through the unique  
202 glycan and interact with the E protein directly. The DE loop, which is the relatively  
203 higher tip of the E protein (Fig. 5), might serve as the viral target of RC. Although  
204 peptides derived from the DE loop were previously found to prevent JEV infection by  
205 interfering with virus attachment to BHK-21 cells (43), the DE loop is not the only or  
206 major receptor binding motif for JEV entry into different types of cells (6). Further  
207 studies should focus on whether RC-101 could inhibit flavivirus infection of different  
208 kinds of cells and whether the DE mutant confers resistance to RC-101 in other hosts  
209 and tissues.

210 Currently, there are no effective drugs approved for the treatment of flavivirus  
211 infection. Fortunately, several peptide inhibitors, derived from the E protein or  
212 targeting the E protein, have been used to successfully block flavivirus infection *in*  
213 *vitro* and *in vivo* (7, 9, 12, 44). As the flavivirus E protein has a highly conserved  
214 sequence and conformation, peptide inhibitors could be used for the treatment of  
215 emerging flavivirus infections or severe cases. In addition, peptide inhibitors have  
216 many advantages, such as high biocompatibility, a low frequency of selecting resistant  
217 mutants, the ability to synergize with conventional drugs, and activity towards  
218 multi-drug resistant virus strains (45). The cyclic peptide RC, with a unique structure  
219 that provides long-lasting protection against viral infection, is a potential candidate for  
220 the development of a successful drug to treat flaviviruses and other infectious

221 diseases.

222 .

223

## 224 **Materials and Methods**

225 **Cells, viruses, and RC-101.** Vero and BHK-21 cells were maintained in Dulbecco's

226 modified Eagle's medium and minimum essential medium containing 10% fetal

227 bovine serum, respectively. The ZIKV strains PRVABC59 (GenBank accession no.

228 KX377337.1) and MR-776 (GenBank accession no. KX377335.1) were kindly

229 provided by Jean K Lim (Icahn School of Medicine at Mount Sinai, NY). The genome

230 sequence of ZIKV strain SZ-WIV001 (GenBank accession no.KU963796) was used

231 as the template for the construction of the ZIKV replicon (46). JEV AT31 was

232 generated using the infectious clones of pMWJEAT AT31 (kindly provided by T.

233 Wakita, Tokyo Metropolitan Institute for Neuroscience) as previously described (47).

234 The JEV variants, including the DE mutant, N154A, H144A, H319A, Q258A, and

235 T410A, were constructed and preserved at  $-80^{\circ}\text{C}$  in our laboratory (6). RC-101 was

236 synthesized by solid-phase synthesis and purified by reversed-phase HPLC to

237 homogeneity (98% purity) (21).

238 **Antiviral effects of RC-101.** Vero cells in 96-well plates were infected with ZIKV

239 PRVABC59 and MR-766 at the indicated MOI in the presence of RC-101 at different

240 concentrations for 48 and 72 h, respectively. The antiviral effects were evaluated by

241 an MTS assay.

242 Time-of-addition assay. Vero cells were infected with ZIKV (MOI, 0.1) for 1 h (0–1

243 h). RC-101 was incubated with the cells for 1 h before infection (-1 to 0 h), during  
244 infection (0 to 1 h), and for 47 or 71 h post-infection (Fig. 2A). To exclude a possible  
245 direct inactivating effect of RC-101, ZIKV was incubated with RC-101 at 37 °C for 1  
246 h, and the mixtures were diluted 25-fold to infect Vero cells. To confirm the inhibitory  
247 effect of RC-101 against ZIKV replication, BHK-21 cells were electroporated with  
248 the ZIKV replicon (SZ-WIV001; Genbank No: KU963796) and then incubated with  
249 RC-101. *Renilla* luciferase activity in the cell lysates was measured using the Rluc  
250 system (Promega, Madison, WI, USA) (48).

251 **Proteolytic activity of NS2B-NS3 protease.** To produce NS2B-GGGGSGGGG-NS3  
252 protein, the ZIKV replicon was used as the template, and the NS2B fragments were  
253 amplified by PCR using primer pairs (forward: 5'-  
254 TTAAGAAGGAGATATACCATGGGCGTGGACATGTACATTGAAAGAG-3';  
255 reverse: 5'-  
256 CACCACTTCCACCTCCACCCGATCCACCTCCACCGATCTCTCTCATGGGGGG  
257 ACC-3'), and NS3 was also amplified using primer pairs (forward: 5'-  
258 GAGATCGGTGGAGGTGGATCGGGTGGAGGTGGAAGTGGTGCTCTATGGGAT  
259 GTGC-3', reverse:  
260 5'-CTCAGTGGTGGTGGTGGTGGTGGTGCTCGAGCTTCTTCAGCATCGAAGGCTC  
261 GAAG-3') (20). The PCR products were cloned into pET28a using infusion PCR  
262 (Novagen, Darmstadt, Germany). The recombinant vector was transformed into *E.*  
263 *coli* BL21(DE3), and the cell lysates were loaded onto a nickel column. The protein  
264 was eluted with a gradient concentration of imidazole buffer (50 mM tris-HCl, 30 mM

265 NaCl, 50–500 mM imidazole, pH 7.0) (35).

266 The proteolytic activity of NS2B-NS3pro was measured using a fluorescence  
267 resonance energy transfer-based assay with a fluorogenic peptide substrate  
268 (Boc-Gly-Arg-Arg-AMC, No: I-1565, Bachem) as the substrate. The relative  
269 fluorescence units were measured using an EnSpire multimode plate reader with the  
270 emission at 440 nm upon excitation at 350 nm. The kinetic parameter of  
271 NS2B-NS3pro was obtained using substrate from 2.5 to 20  $\mu$ M in the fluorescent  
272 assay after a 30-min incubation at 37 °C (20, 49). The  $K_m$  was calculated from the  
273 enzyme kinetics-velocity as a function of substrate model using GraphPad Prism 8.0.  
274 The inhibitory effects of RC-101 against protease activities was assessed at 37 °C for  
275 30 min, with mixtures of 100  $\mu$ l consisting of 12  $\mu$ M fluorogenic peptide substrate,  
276 1.25  $\mu$ M of NS2B-NS3pro, and RC-101 ranging from 0 to 100  $\mu$ M, buffered at pH 8.5  
277 with 200 mM tris–HCl. The  $IC_{50}$  value of RC-101 was evaluated using the non-linear  
278 regression model in GraphPad Prism 8.0.

279 **Expression of WT and DE mutant DIII.** The WT DIII expression vector was  
280 constructed using pET-22b(+) and preserved in our laboratory (7). The DE mutant  
281 was constructed using the East Mutagenesis System Kit (TransGen Biotech, China)  
282 with the following primer pairs (forward: 5'-  
283 CAGTGAACCCCTTCGTCGCGGCGGCGGCGGCGTCAAAGGTGC-3';  
284 reverse:  
285 5'-CGCCGCCGCGCCGCGCGACGAAGGGGTTCACTGTCACCAGCCG-3')  
286 (6). WT DIII was expressed using *E. coli* BL21 (DE3); the supernatant of the bacterial

287 pellets was loaded onto a nickel column, and the bound protein was eluted with a  
288 gradient concentration of imidazole buffer. DE mutant DIII, expressed as inclusion  
289 bodies, was solubilized in 8 M urea (50 mM tris-HCl, 100 mM NaCl, 1mM DTT, 0.1%  
290 SDS, 8 M urea, pH 7.4). Refolding was carried out by titration dialysis at 4 °C against  
291 refolding buffer (50 mM tris-HCl, 100 mM NaCl , 0.1% SDS, 1 mM L(+)-arginine, 1  
292 mM glutathione, 5% glycerine, pH 7.4) until the concentration of urea was < 2 M.  
293 Then, the supernatant was passed through a nickel column as described previously  
294 herein.

295 **Binding affinity assay.** Real-time binding assays between RC-101 and WT or the DE  
296 mutant DIII were performed using biolayer interferometry on an Octet QK system  
297 (Fortebio, USA) according to previously reported methods (7). Binding kinetics were  
298 calculated using the Octet QK software package, which fit the observation to a 1:1  
299 model to calculate the association and dissociation rate constants. Binding affinities  
300 were calculated as the  $K_d$  rate constant divided by the  $K_a$  rate constant.

301 **Docking of the NS2B-NS3/RC-2 complex.** The crystal structures of RC-2 (PDB  
302 2ZLI) and ZIKV NS3 (PDB: 5ZMS) were used to build the complex using the  
303 ZDOCK 3.0.2 program (<http://zdock.umassmed.edu>) (50). The resulting model was  
304 represented by PyMOL.

305

## 306 **ACKNOWLEDGEMENTS**

307 We thank the Center for Instrumental Analysis and Metrology, and Core Facility and  
308 Technical Support, Wuhan Institute of Virology, for providing technical assistance.

309 This work was supported by the National Key Research and Development Program of  
310 China (2018YFA0507204), the National Natural Sciences Foundation of China  
311 (31670165), Wuhan National Biosafety Laboratory, Chinese Academy of Sciences  
312 Advanced Customer Cultivation Project (2019ACCP-MS03), the Open Research  
313 Fund Program of the State Key Laboratory of Virology of China (2018IOV001).

314

#### 315 References

- 316 1. Mackenzie JS, Gubler DJ, Petersen LR. 2004. Emerging flaviviruses: the  
317 spread and resurgence of Japanese encephalitis, West Nile and dengue viruses.  
318 Nat Med 10:S98-109.
- 319 2. Unni SK, Ruzek D, Chhatbar C, Mishra R, Johri MK, Singh SK. 2011.  
320 Japanese encephalitis virus: from genome to infectome. Microbes Infect  
321 13:312-21.
- 322 3. Rey FA, Heinz FX, Mandl C, Kunz C, Harrison SC. 1995. The envelope  
323 glycoprotein from tick-borne encephalitis virus at 2 Å resolution. Nature  
324 375:291-8.
- 325 4. Zhao H, Fernandez E, Dowd KA, Speer SD, Platt DJ, Gorman MJ, Govero J,  
326 Nelson CA, Pierson TC, Diamond MS, Fremont DH. 2016. Structural Basis of  
327 Zika Virus-Specific Antibody Protection. Cell 166:1016-27.
- 328 5. Luca VC, AbiMansour J, Nelson CA, Fremont DH. 2012. Crystal structure of  
329 the Japanese encephalitis virus envelope protein. J Virol 86:2337-46.
- 330 6. Liu H, Liu Y, Wang S, Zhang Y, Zu X, Zhou Z, Zhang B, Xiao G. 2015.

- 331 Structure-based mutational analysis of several sites in the E protein:  
332 implications for understanding the entry mechanism of Japanese encephalitis  
333 virus. *J Virol* 89:5668-86.
- 334 7. Zu X, Liu Y, Wang S, Jin R, Zhou Z, Liu H, Gong R, Xiao G, Wang W. 2014.  
335 Peptide inhibitor of Japanese encephalitis virus infection targeting envelope  
336 protein domain III. *Antiviral Res* 104:7-14.
- 337 8. Lee E, Weir RC, Dalgarno L. 1997. Changes in the dengue virus major  
338 envelope protein on passaging and their localization on the three-dimensional  
339 structure of the protein. *Virology* 232:281-90.
- 340 9. Chen L, Liu Y, Wang S, Sun J, Wang P, Xin Q, Zhang L, Xiao G, Wang W.  
341 2017. Antiviral activity of peptide inhibitors derived from the protein E stem  
342 against Japanese encephalitis and Zika viruses. *Antiviral Res* 141:140-149.
- 343 10. Bressanelli S, Stiasny K, Allison SL, Stura EA, Duquerroy S, Lescar J, Heinz  
344 FX, Rey FA. 2004. Structure of a flavivirus envelope glycoprotein in its  
345 low-pH-induced membrane fusion conformation. *EMBO J* 23:728-38.
- 346 11. Modis Y, Ogata S, Clements D, Harrison SC. 2004. Structure of the dengue  
347 virus envelope protein after membrane fusion. *Nature* 427:313-9.
- 348 12. Yu Y, Deng YQ, Zou P, Wang Q, Dai Y, Yu F, Du L, Zhang NN, Tian M, Hao  
349 JN, Meng Y, Li Y, Zhou X, Fuk-Woo Chan J, Yuen KY, Qin CF, Jiang S, Lu L.  
350 2017. A peptide-based viral inactivator inhibits Zika virus infection in  
351 pregnant mice and fetuses. *Nat Commun* 8:15672.
- 352 13. Wang Q, Yang H, Liu X, Dai L, Ma T, Qi J, Wong G, Peng R, Liu S, Li J, Li S,



- 353 Song J, Liu J, He J, Yuan H, Xiong Y, Liao Y, Li J, Yang J, Tong Z, Griffin BD,  
354 Bi Y, Liang M, Xu X, Qin C, Cheng G, Zhang X, Wang P, Qiu X, Kobinger G,  
355 Shi Y, Yan J, Gao GF. 2016. Molecular determinants of human neutralizing  
356 antibodies isolated from a patient infected with Zika virus. *Sci Transl Med*  
357 8:369ra179.
- 358 14. Luo D, Vasudevan SG, Lescar J. 2015. The flavivirus NS2B-NS3  
359 protease-helicase as a target for antiviral drug development. *Antiviral Res*  
360 118:148-58.
- 361 15. Sampath A, Padmanabhan R. 2009. Molecular targets for flavivirus drug  
362 discovery. *Antiviral Res* 81:6-15.
- 363 16. Arnett E, Lehrer RI, Pratikhya P, Lu W, Seveau S. 2011. Defensins enable  
364 macrophages to inhibit the intracellular proliferation of *Listeria*  
365 *monocytogenes*. *Cell Microbiol* 13:635-51.
- 366 17. Leonova L, Kokryakov VN, Aleshina G, Hong T, Nguyen T, Zhao C, Waring  
367 AJ, Lehrer RI. 2001. Circular minidefensins and posttranslational generation  
368 of molecular diversity. *J Leukoc Biol* 70:461-4.
- 369 18. Tang YQ, Yuan J, Osapay G, Osapay K, Tran D, Miller CJ, Ouellette AJ,  
370 Selsted ME. 1999. A cyclic antimicrobial peptide produced in primate  
371 leukocytes by the ligation of two truncated alpha-defensins. *Science*  
372 286:498-502.
- 373 19. Tran D, Tran PA, Tang YQ, Yuan J, Cole T, Selsted ME. 2002. Homodimeric  
374 theta-defensins from rhesus macaque leukocytes: isolation, synthesis,

- 375 antimicrobial activities, and bacterial binding properties of the cyclic peptides.  
376 *J Biol Chem* 277:3079-84.
- 377 20. Rothan HA, Han HC, Ramasamy TS, Othman S, Rahman NA, Yusof R. 2012.  
378 Inhibition of dengue NS2B-NS3 protease and viral replication in Vero cells by  
379 recombinant retrocyclin-1. *BMC Infect Dis* 12:314.
- 380 21. Prantner D, Shirey KA, Lai W, Lu W, Cole AM, Vogel SN, Garzino-Demo A.  
381 2017. The theta-defensin retrocyclin 101 inhibits TLR4- and TLR2-dependent  
382 signaling and protects mice against influenza infection. *J Leukoc Biol*  
383 102:1103-1113.
- 384 22. Wang W, Cole AM, Hong T, Waring AJ, Lehrer RI. 2003. Retrocyclin, an  
385 antiretroviral theta-defensin, is a lectin. *J Immunol* 170:4708-16.
- 386 23. Leikina E, Delanoe-Ayari H, Melikov K, Cho MS, Chen A, Waring AJ, Wang  
387 W, Xie Y, Loo JA, Lehrer RI, Chernomordik LV. 2005. Carbohydrate-binding  
388 molecules inhibit viral fusion and entry by crosslinking membrane  
389 glycoproteins. *Nat Immunol* 6:995-1001.
- 390 24. Yasin B, Wang W, Pang M, Cheshenko N, Hong T, Waring AJ, Herold BC,  
391 Wagar EA, Lehrer RI. 2004. Theta defensins protect cells from infection by  
392 herpes simplex virus by inhibiting viral adhesion and entry. *J Virol*  
393 78:5147-56.
- 394 25. Carbaugh DL, Lazear HM. 2020. Flavivirus Envelope Protein Glycosylation:  
395 Impacts on Viral Infection and Pathogenesis. *J Virol* 94.
- 396 26. Goo L, DeMaso CR, Pelc RS, Ledgerwood JE, Graham BS, Kuhn RJ, Pierson

- 397 TC. 2018. The Zika virus envelope protein glycan loop regulates virion  
398 antigenicity. *Virology* 515:191-202.
- 399 27. Frumence E, Viranaicken W, Bos S, Alvarez-Martinez MT, Roche M, Arnaud  
400 JD, Gadea G, Despres P. 2019. A Chimeric Zika Virus between Viral Strains  
401 MR766 and BeH819015 Highlights a Role for E-glycan Loop in  
402 Antibody-mediated Virus Neutralization. *Vaccines (Basel)* 7.
- 403 28. Fontes-Garfias CR, Shan C, Luo H, Muruato AE, Medeiros DBA, Mays E,  
404 Xie X, Zou J, Roundy CM, Wakamiya M, Rossi SL, Wang T, Weaver SC, Shi  
405 PY. 2017. Functional Analysis of Glycosylation of Zika Virus Envelope  
406 Protein. *Cell Rep* 21:1180-1190.
- 407 29. Carbaugh DL, Baric RS, Lazear HM. 2019. Envelope Protein Glycosylation  
408 Mediates Zika Virus Pathogenesis. *J Virol* 93.
- 409 30. Beaver JT, Lelutiu N, Habib R, Skountzou I. 2018. Evolution of Two Major  
410 Zika Virus Lineages: Implications for Pathology, Immune Response, and  
411 Vaccine Development. *Front Immunol* 9:1640.
- 412 31. Annamalai AS, Pattnaik A, Sahoo BR, Muthukrishnan E, Natarajan SK,  
413 Steffen D, Vu HLX, Delhon G, Osorio FA, Petro TM, Xiang SH, Pattnaik AK.  
414 2017. Zika Virus Encoding Nonglycosylated Envelope Protein Is Attenuated  
415 and Defective in Neuroinvasion. *J Virol* 91.
- 416 32. Puig-Basagoiti F, Deas TS, Ren P, Tilgner M, Ferguson DM, Shi PY. 2005.  
417 High-throughput assays using a luciferase-expressing replicon, virus-like  
418 particles, and full-length virus for West Nile virus drug discovery. *Antimicrob*

- 419 Agents Chemother 49:4980-8.
- 420 33. Wang S, Liu H, Zu X, Liu Y, Chen L, Zhu X, Zhang L, Zhou Z, Xiao G, Wang  
421 W. 2016. The ubiquitin-proteasome system is essential for the productive entry  
422 of Japanese encephalitis virus. *Virology* 498:116-127.
- 423 34. Lei J, Hansen G, Nitsche C, Klein CD, Zhang L, Hilgenfeld R. 2016. Crystal  
424 structure of Zika virus NS2B-NS3 protease in complex with a boronate  
425 inhibitor. *Science* 353:503-5.
- 426 35. Lim HJ, Nguyen TT, Kim NM, Park JS, Jang TS, Kim D. 2017. Inhibitory  
427 effect of flavonoids against NS2B-NS3 protease of ZIKA virus and their  
428 structure activity relationship. *Biotechnol Lett* 39:415-421.
- 429 36. Chambers TJ, Hahn CS, Galler R, Rice CM. 1990. Flavivirus genome  
430 organization, expression, and replication. *Annu Rev Microbiol* 44:649-88.
- 431 37. Lee E, Leang SK, Davidson A, Lobigs M. 2010. Both E protein glycans  
432 adversely affect dengue virus infectivity but are beneficial for virion release. *J*  
433 *Virol* 84:5171-80.
- 434 38. Johnson AJ, Guirakhoo F, Roehrig JT. 1994. The envelope glycoproteins of  
435 dengue 1 and dengue 2 viruses grown in mosquito cells differ in their  
436 utilization of potential glycosylation sites. *Virology* 203:241-9.
- 437 39. Conibear AC, Rosengren KJ, Harvey PJ, Craik DJ. 2012. Structural  
438 characterization of the cyclic cystine ladder motif of theta-defensins.  
439 *Biochemistry* 51:9718-26.
- 440 40. Phoo WW, Zhang Z, Wirawan M, Chew EJC, Chew ABL, Kouretova J,

- 441 Steinmetzer T, Luo D. 2018. Structures of Zika virus NS2B-NS3 protease in  
442 complex with peptidomimetic inhibitors. *Antiviral Res* 160:17-24.
- 443 41. Erbel P, Schiering N, D'Arcy A, Renatus M, Kroemer M, Lim SP, Yin Z,  
444 Keller TH, Vasudevan SG, Hommel U. 2006. Structural basis for the  
445 activation of flaviviral NS3 proteases from dengue and West Nile virus. *Nat*  
446 *Struct Mol Biol* 13:372-3.
- 447 42. Pokidysheva E, Zhang Y, Battisti AJ, Bator-Kelly CM, Chipman PR, Xiao C,  
448 Gregorio GG, Hendrickson WA, Kuhn RJ, Rossmann MG. 2006. Cryo-EM  
449 reconstruction of dengue virus in complex with the carbohydrate recognition  
450 domain of DC-SIGN. *Cell* 124:485-93.
- 451 43. Li C, Zhang LY, Sun MX, Li PP, Huang L, Wei JC, Yao YL, Isahg H, Chen PY,  
452 Mao X. 2012. Inhibition of Japanese encephalitis virus entry into the cells by  
453 the envelope glycoprotein domain III (EDIII) and the loop3 peptide derived  
454 from EDIII. *Antiviral Res* 94:179-83.
- 455 44. Schmidt AG, Yang PL, Harrison SC. 2010. Peptide inhibitors of flavivirus  
456 entry derived from the E protein stem. *J Virol* 84:12549-54.
- 457 45. Batoni G, Maisetta G, Brancatisano FL, Esin S, Campa M. 2011. Use of  
458 antimicrobial peptides against microbial biofilms: advantages and limits. *Curr*  
459 *Med Chem* 18:256-79.
- 460 46. Li JQ, Deng CL, Gu D, Li X, Shi L, He J, Zhang QY, Zhang B, Ye HQ. 2018.  
461 Development of a replicon cell line-based high throughput antiviral assay for  
462 screening inhibitors of Zika virus. *Antiviral Res* 150:148-154.

- 463 47. Li XD, Li XF, Ye HQ, Deng CL, Ye Q, Shan C, Shang BD, Xu LL, Li SH,  
464 Cao SB, Yuan ZM, Shi PY, Qin CF, Zhang B. 2014. Recovery of a chemically  
465 synthesized Japanese encephalitis virus reveals two critical adaptive mutations  
466 in NS2B and NS4A. *J Gen Virol* 95:806-15.
- 467 48. Guo J, Jia X, Liu Y, Wang S, Cao J, Zhang B, Xiao G, Wang W. 2020.  
468 Inhibition of Na(+)/K(+) ATPase blocks Zika virus infection in mice. *Commun*  
469 *Biol* 3:380.
- 470 49. Rothan HA, Abdulrahman AY, Sasikumer PG, Othman S, Rahman NA, Yusof  
471 R. 2012. Protegrin-1 inhibits dengue NS2B-NS3 serine protease and viral  
472 replication in MK2 cells. *J Biomed Biotechnol* 2012:251482.
- 473 50. Pierce BG, Wiehe K, Hwang H, Kim BH, Vreven T, Weng Z. 2014. ZDOCK  
474 server: interactive docking prediction of protein-protein complexes and  
475 symmetric multimers. *Bioinformatics* 30:1771-3.
- 476 51. Robert X, Gouet P. 2014. Deciphering key features in protein structures with  
477 the new ENDscript server. *Nucleic Acids Res* 42:W320-4.

478

## 479 **Figure legends**

480 Fig. 1. RC-101 inhibits Zika virus (ZIKV) infection. (A) Stick diagram of the crystal  
481 structure of RC-2 (PDB: 2LZI). (B) Schematic diagram of RC-101. Color in the  
482 schematic diagram correlates with those in the panel A. (C, D) RC-101 inhibits ZIKV  
483 strain PRVABC59 and strain MR766 infections. The experiments were carried out on  
484 Vero cells, and the experimental timeline is shown in C and D. After 48 or 72 h, the

485 inhibitory effects were determined using an MTS assay.

486 Fig. 2. Time-of-addition analysis of the antiviral activity of the RC-101. (A)

487 Schematic illustration of time-of-addition experiment. Vero cells were infected with

488 Zika virus (ZIKV) PRVABC59 (B) and MR766 (C) (MOI: 0.1) for 1 h. RC-101 (40

489  $\mu\text{M}$ ) was introduced at different time points, designated as virucidal, pretreatment

490 (pre), during treatment (during), or post-treatment (post). The inhibitory effect of the

491 drugs in each group was determined by plaque assays.

492 Fig. 3. RC-101 inhibits Zika virus (ZIKV) replicon activity. (A, B) BHK-21 cells

493 transfected with the ZIKV replicon were treated with RC-101 and luciferase activities

494 were determined at 2 h (B) and 48 h (C).

495 Fig. 4. RC-101 inhibits the NS2B-NS3 serine protease activity. (A) Enzyme kinetic

496 assay of NS2B-NS3pro activity. The fluorogenic substrate peptide

497 (Boc-Gly-Arg-Arg-AMC) was serially diluted to assess the activity of Zika virus

498 (ZIKV) protease. The relative fluorescence units (RFUs) were measured using an

499 EnSpire multimode plate reader with the emission at 440 nm upon excitation at 350

500 nm. (B) The inhibitory effect of RC-101 against the activity of ZIKV NS2B-NS3pro.

501 The reaction mixtures of NS2B-NS3pro (100  $\mu\text{l}$ ) consisted of 12  $\mu\text{M}$  substrate peptide,

502 1.25  $\mu\text{M}$  of NS2B-NS3pro, and RC-101 of varying concentrations with a buffer

503 comprised of 200 mM tris-HCl (pH 8.5), and this was incubated at 37 °C for 30 min.

504 Fig. 5. The potential viral target of RC-101 on flavivirus E protein. Side view of

505 monomer prefusion Japanese encephalitis virus (JEV) E protein ectodomain

506 conformation (cyan, PDB: 3P54) in alignment with the full-length Zika virus (ZIKV)

507 E protein (gray, PDB: 5IRE). The potential targets tested in this study were enlarged  
508 and highlighted by colors.

509 Fig. 6. Sensitivity/resistance of the mutant viruses to RC-101. (A) Timeline of the  
510 assay. (B) BHK-21 cell lysates were analyzed by western blotting at 24 h  
511 post-infection, and rabbit prM antiserum, as well as the anti-GAPDH mouse  
512 monoclonal antibody, were used as primary antibodies. (C) The viral titers were tested  
513 by plaque forming assays using BHK-21 cells. Data are represented as the means  $\pm$   
514 SDs from 4–6 independent experiments. \*\*\*,  $P < 0.001$ ; \*\*,  $P < 0.01$ ; \*,  $P < 0.05$ .

515 Fig. 7. A DE loop mutation decreases the binding affinity of RC-101 to E protein  
516 domain III (DIII). WT DIII (A), DE loop mutant DIII (B), and BSA (C) were  
517 immobilized onto biosensors. The binding of RC-101 was assessed at 200 nM (red),  
518 100 nM (orange), and 50 nM (yellow), and the global fit curves are shown as black  
519 lines. The vertical dashed lines indicate the transition between association and  
520 dissociation phases. (D) The binding affinities of WT and DE loop DIII to RC-101.

521 Fig. 8. Docking of the NS2B-NS3/RC-2 complex. (A) Sequence alignment of the  
522 flavivirus NS3 N-terminal domain (1503–1688). Secondary structure elements were  
523 graphically represented by ESPript (51) (<http://esript.ibcp.fr>). The secondary  
524 structure observed with Zika virus (ZIKV) NS2B-NS3 protease (PDB: 5GXJ) is  
525 indicated above the sequence. The catalytic triad residues are indicated by a red  
526 asterisk. The relevant sequence accession numbers are as follows: ZIKV (strain  
527 SZ01, Genbank: KU866423.2), ZIKV (strain PRVABC59, MK713748.1), ZIKV  
528 (strain MR766, AY632535.2), Japanese encephalitis virus (JEV; strain AT31,



529 AB196923.1), West Nile virus (WNV; NC\_001563.2), dengue virus (DENV)-1  
530 (AY145122.1), DENV-2 (NC\_001474.2), DENV-3 (MN227700.1), DENV-4  
531 (KY924607.1), Tick-borne encephalitis virus (MT311860.1) (B) The ribbon diagram  
532 of the NS2B-NS3/RC-2 complex. The crystal structure of RC-2 (PDB 2ZLI) and  
533 ZIKV NS3 (PDB: 5ZMS) was used to build the complex using the ZDOCK 3.0.2  
534 program. NS2B, NS3, and RC-2 are colored as cyan, magenta, and green, respectively.  
535 The supposed interacting residues between NS3 and RC-2 are shown as sticks.  
536

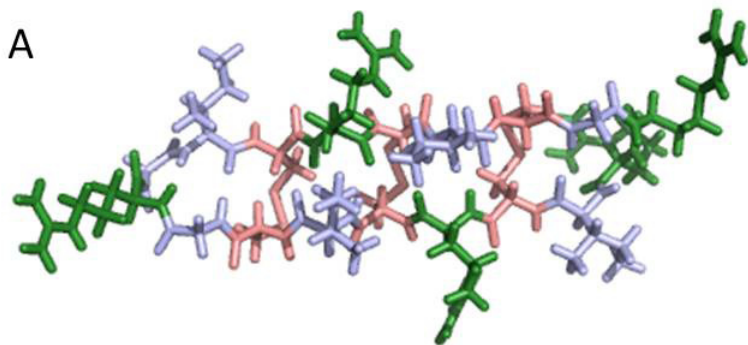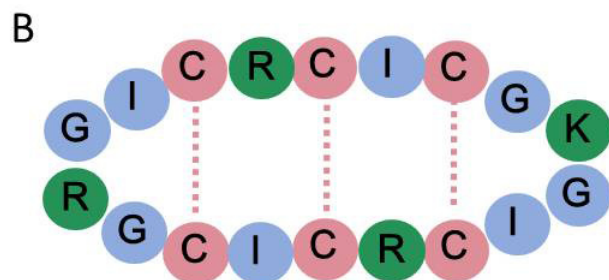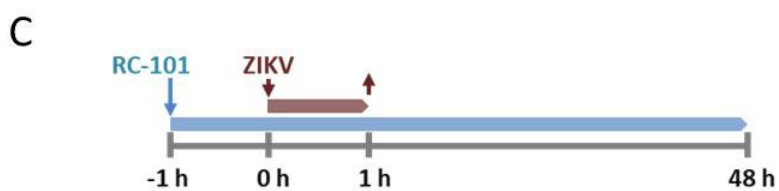

**PRVABC 59 MOI 0.1**

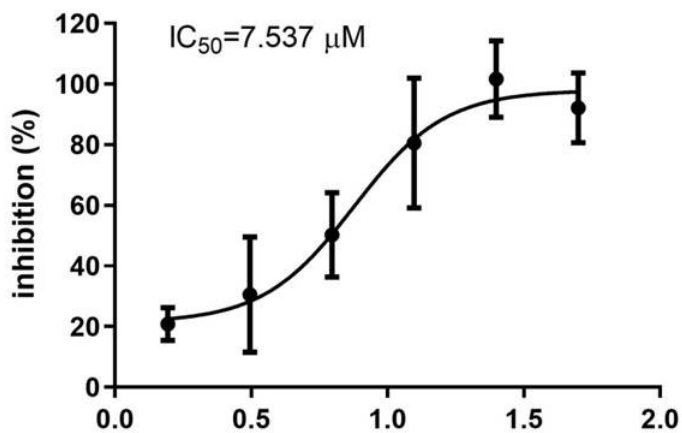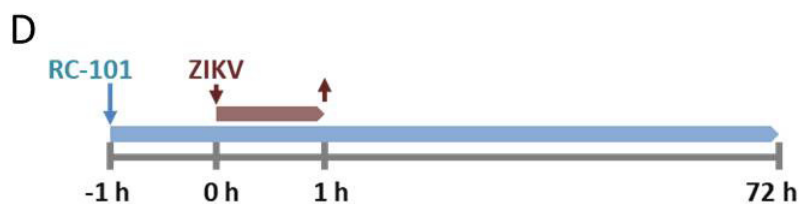

**MR766 MOI 0.1**

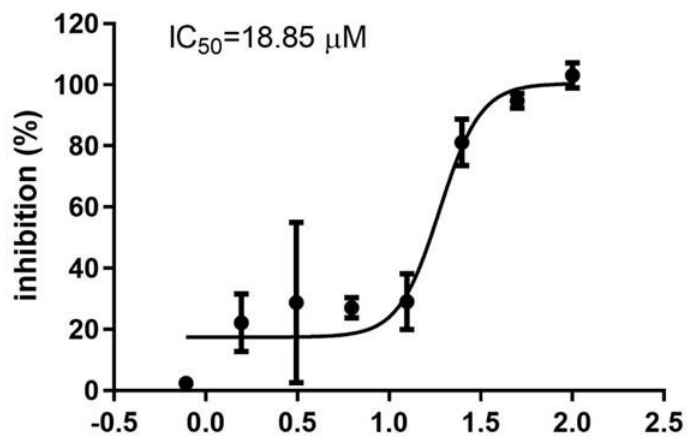

concentration (log10,  $\mu M$ )

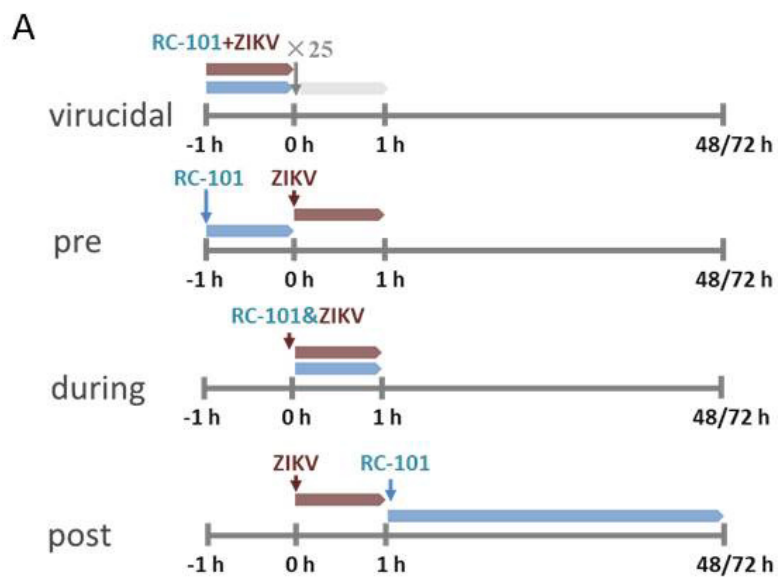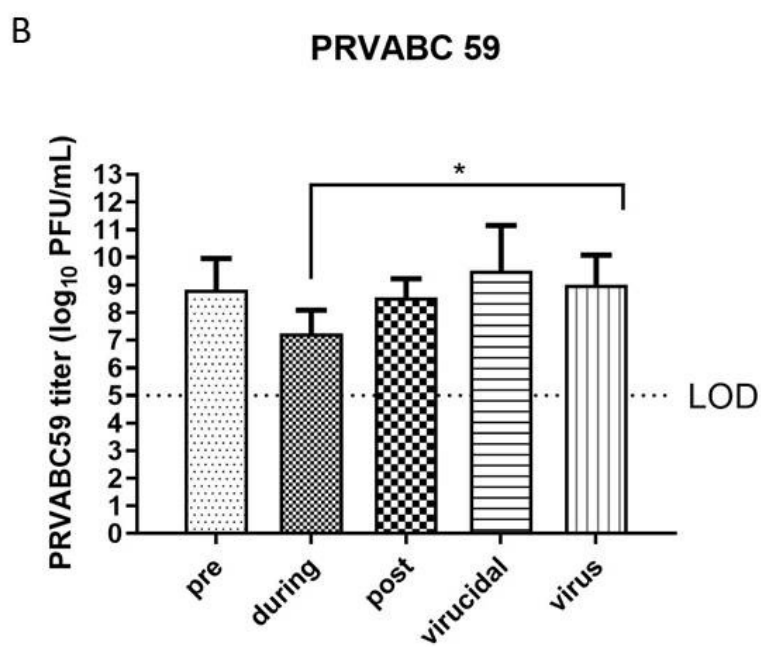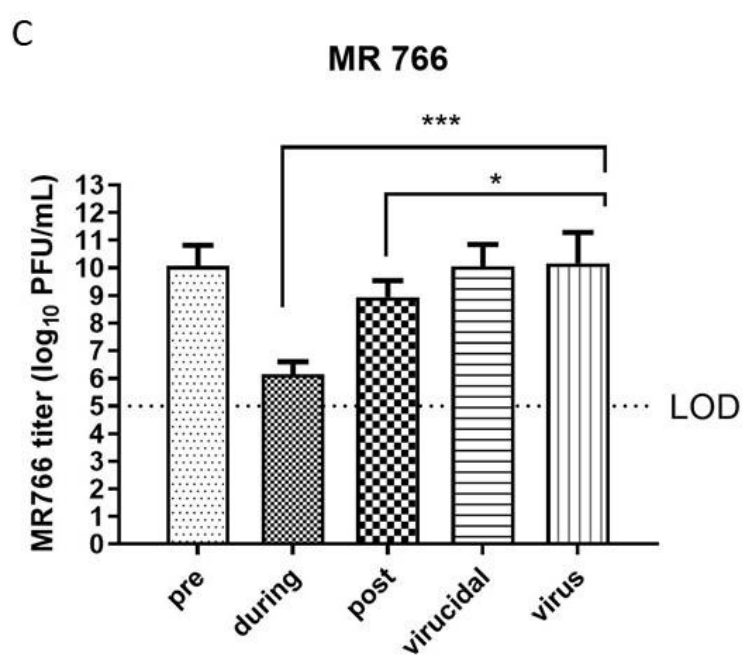

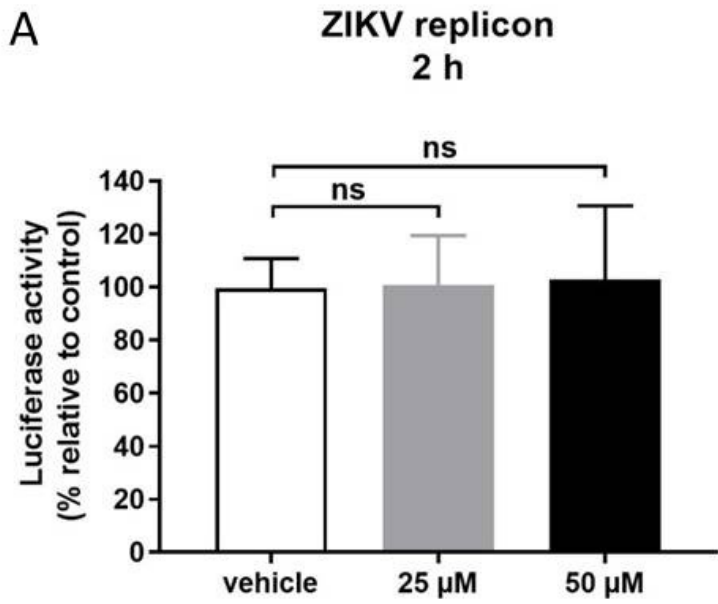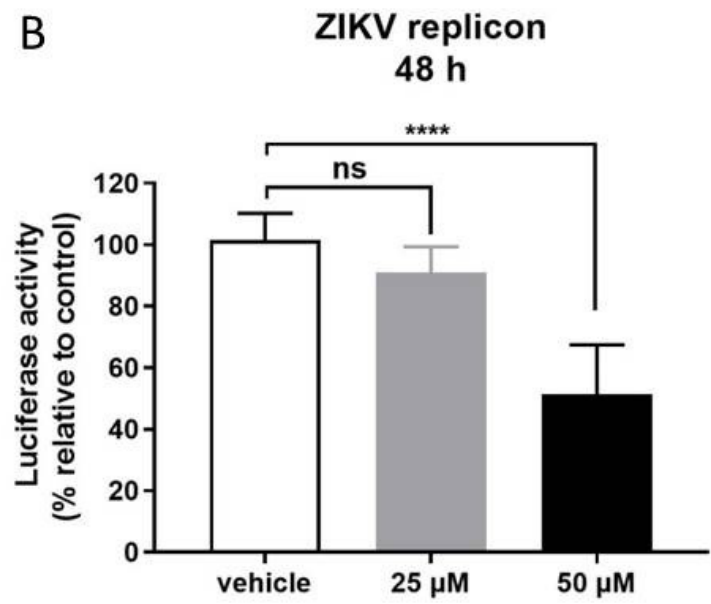

**A** The activity of ZIKV NS2B-NS3pro

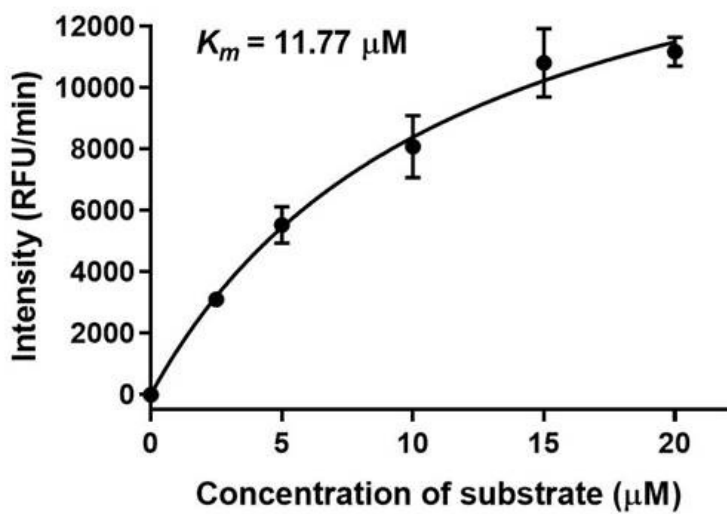

**B** RC-101 vs. ZIKV NS2B-NS3pro

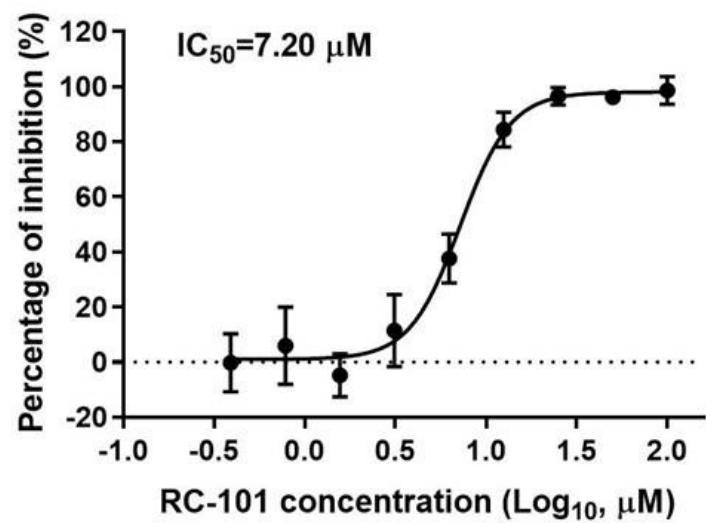

3P54: JEV E  
5IRE: ZIKV E

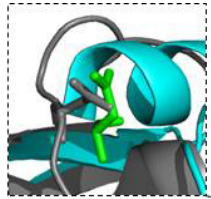

N154

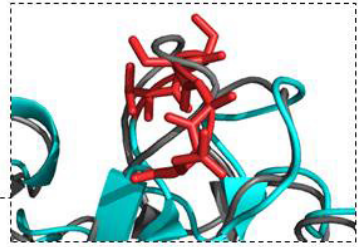

T<sub>363</sub>SSAN<sub>367</sub>

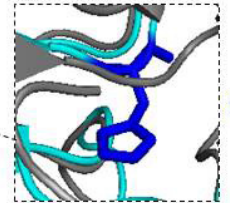

H144

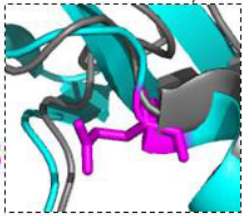

Q258

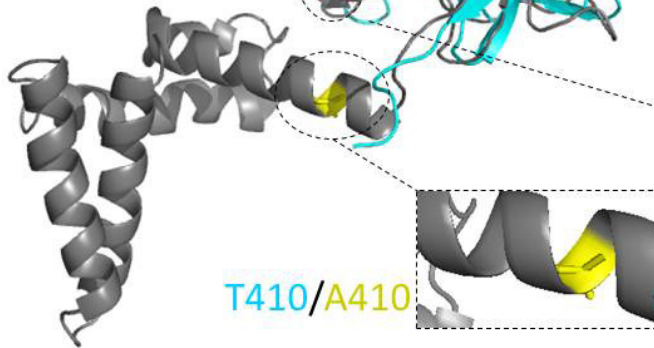

T410/A410

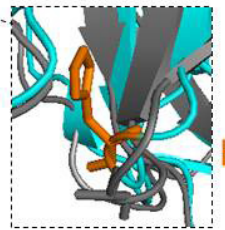

H319

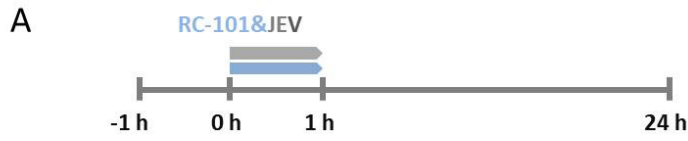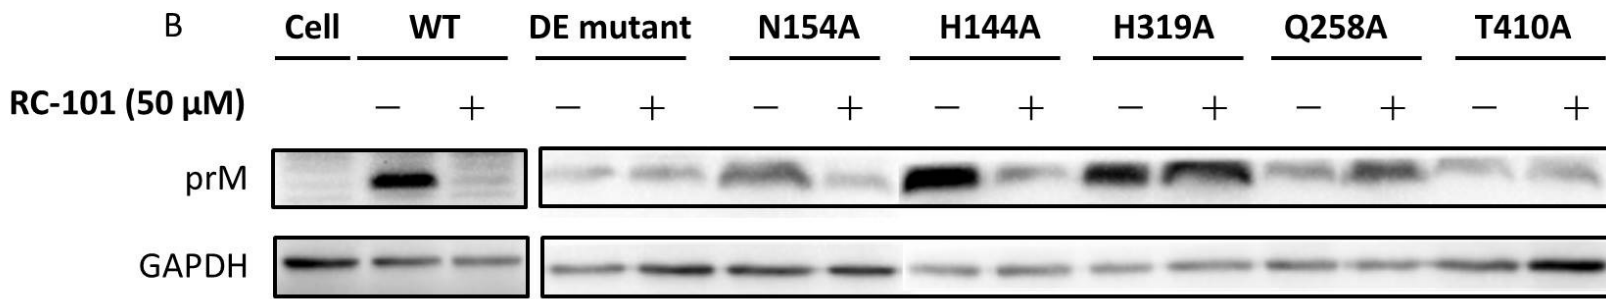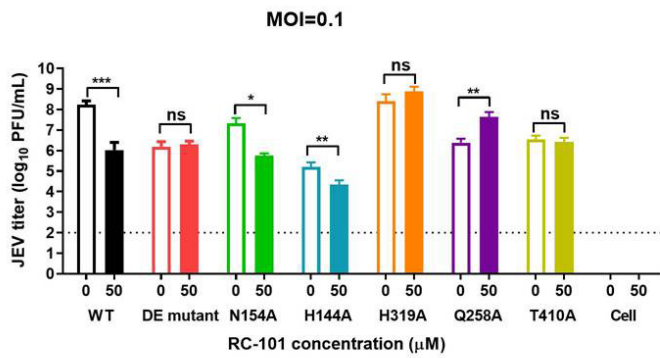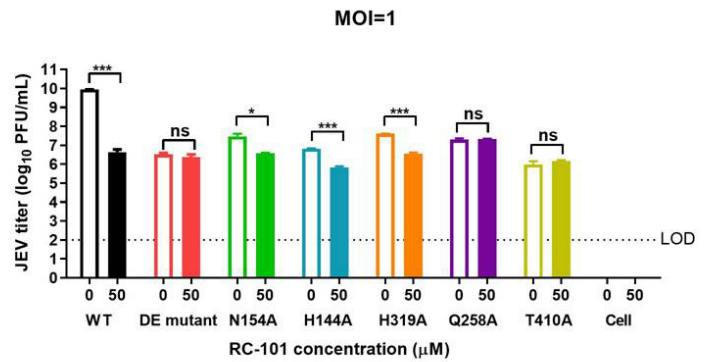

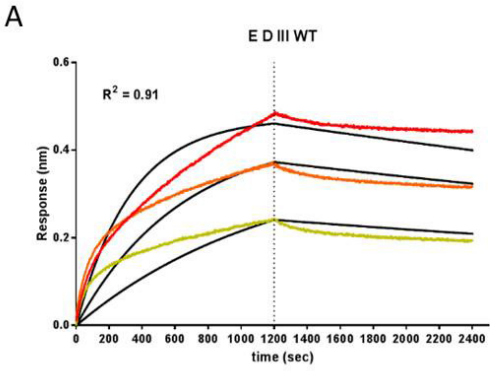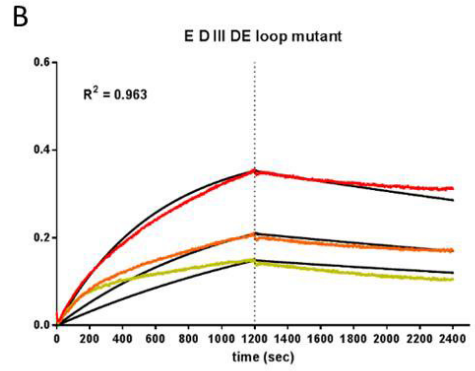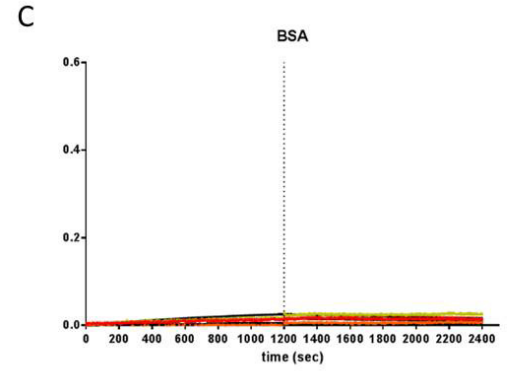

**D**

|           | $K_a$ (1/M s)      | $K_d$ (1/s)           | $K_D$ (M)             |
|-----------|--------------------|-----------------------|-----------------------|
| WT        | $1.46 \times 10^4$ | $1.18 \times 10^{-4}$ | $8.1 \times 10^{-9}$  |
| DE mutant | $7.40 \times 10^3$ | $1.75 \times 10^{-4}$ | $2.37 \times 10^{-8}$ |



A

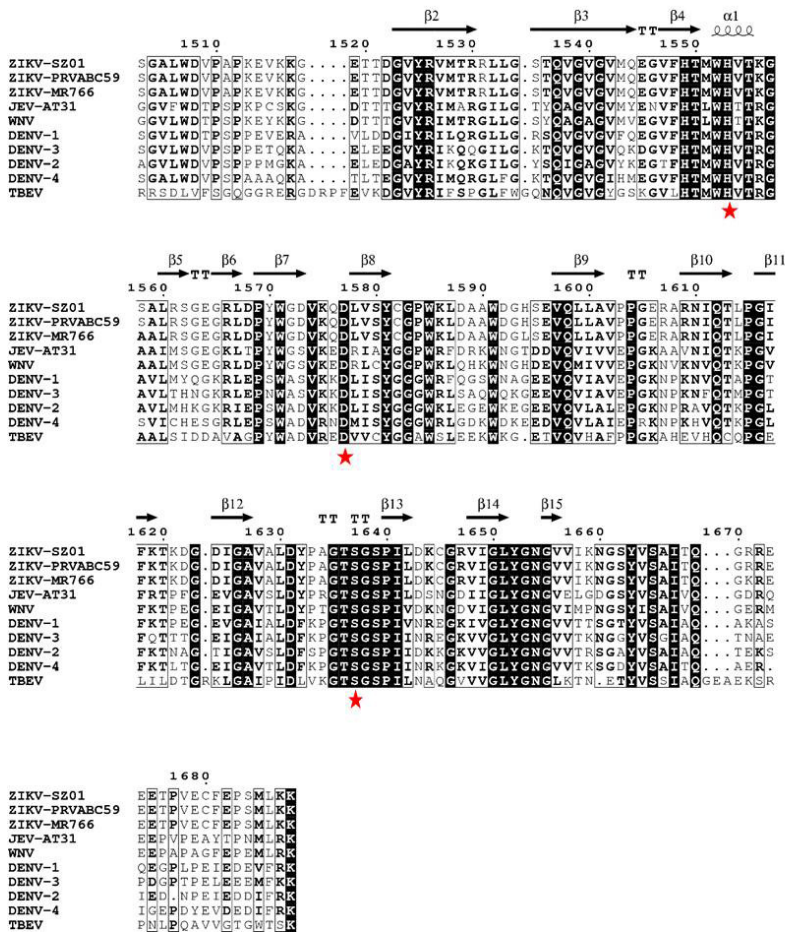

B

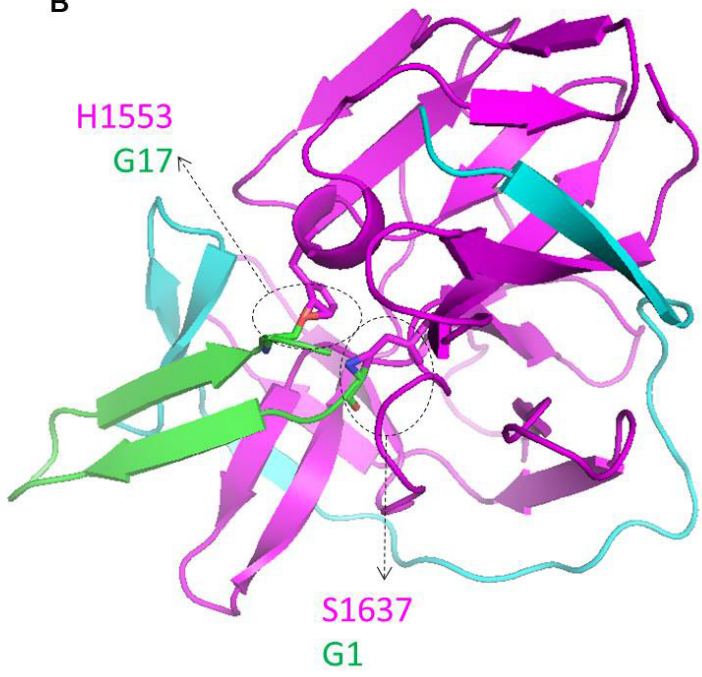

Source: https://biorxiv.org/content/10.1101/2020.12.15.422996v1.full.pdf
